# Supplementary material for: The interactions of dopamine and oxidative damage in the striatum of patients with neurodegenerative diseases
Source: PubMed Central journal article supplement (PMC6981021; doi:10.1111/jnc.14898), 2019-11-04

20180727 Dopamine ELISA Assay

|   |             |    |    |   |   |    |    |    |    |    |    |    |
|---|-------------|----|----|---|---|----|----|----|----|----|----|----|
|   | 1           | 2  | 3  | 4 | 5 | 6  | 7  | 8  | 9  | 10 | 11 | 12 |
| A | S1 0ng/ml   | S1 | S1 | 1 | 5 | 9  | 13 | 17 | 21 | 25 | 29 | 33 |
| B | 2 1.56ng/ml | S2 | S2 |   |   |    |    |    |    |    |    |    |
| C | 3 3.13ng/ml | S3 | S3 | 2 | 6 | 10 | 14 | 18 | 22 | 26 | 30 | 34 |
| D | 4 6.25ng/ml | S4 | S4 |   |   |    |    |    |    |    |    |    |
| E | 5 12.5ng/ml | S5 | S5 | 3 | 7 | 11 | 15 | 19 | 23 | 27 | 31 | 35 |
| F | 6 25ng/ml   | S6 | S6 |   |   |    |    |    |    |    |    |    |
| G | 7 50ng/ml   | S7 | S7 | 4 | 8 | 12 | 16 | 20 | 24 | 28 | 32 | 36 |
| H | 8 100ng/ml  | S8 | S8 |   |   |    |    |    |    |    |    |    |

|   | 1        | 2        | 3        | 4        | 5        | 6        | 7        | 8        | 9        | 10       | 11       | 12       | Standard  | OD Value |
|---|----------|----------|----------|----------|----------|----------|----------|----------|----------|----------|----------|----------|-----------|----------|
| A | 0.707253 | 0.681343 | 0.681999 | 0.341572 | 0.518065 | 0.402584 | 0.558072 | 0.387789 | 0.315314 | 0.207068 | 0.186176 | 0.1852   | 0ng/ml    | 0.690199 |
| B | 0.392003 | 0.388857 | 0.369845 | 0.411787 | 0.607885 | 0.535036 | 0.677805 | 0.438098 | 0.323125 | 0.233721 | 0.242775 | 0.217132 | 1.56ng/ml | 0.383568 |
| C | 0.283052 | 0.285571 | 0.292015 | 0.703282 | 0.571917 | 0.482393 | 0.462326 | 0.565313 | 0.568229 | 0.393722 | 0.151354 | 0.252654 | 3.13ng/ml | 0.286879 |
| D | 0.216837 | 0.222245 | 0.238347 | 0.725134 | 0.622849 | 0.474186 | 0.489839 | 0.557319 | 0.582043 | 0.389597 | 0.142372 | 0.241531 | 6.25ng/ml | 0.22581  |
| E | 0.191827 | 0.180106 | 0.215397 | 0.484337 | 0.298756 | 0.338298 | 0.320722 | 0.484665 | 0.181744 | 0.710691 | 0.249574 | 0.270494 | 12.5ng/ml | 0.195777 |
| F | 0.13755  | 0.151676 | 0.178816 | 0.495982 | 0.317439 | 0.348801 | 0.276322 | 0.490823 | 0.202342 | 0.731175 | 0.246496 | 0.279661 | 25ng/ml   | 0.156014 |
| G | 0.108596 | 0.133657 | 0.161741 | 0.512142 | 0.73785  | 0.372858 | 0.28575  | 0.739575 | 0.535879 | 0.559779 | 0.256619 | 0.094162 | 50ng/ml   | 0.134665 |
| H | 0.103008 | 0.1291   | 0.119813 | 0.456212 | 0.702893 | 0.390115 | 0.282993 | 0.780328 | 0.441641 | 0.480786 | 0.25235  | 0.0863   | 100ng/ml  | 0.117307 |

| LBD-Ca |          |           | LBD-Ca   |    |          | LBD-Ca    |          |    |          |           |          |
|--------|----------|-----------|----------|----|----------|-----------|----------|----|----------|-----------|----------|
|        | OD Value | DA(ng/ml) | DA(ng/g) |    | OD Value | DA(ng/ml) | DA(ng/g) |    | OD Value | DA(ng/ml) | DA(ng/g) |
| 1      | 0.37668  | 1.56357   | 14.07213 | 5  | 0.562975 | 0.28477   | 2.56293  | 9  | 0.46881  | 0.72638   | 6.53742  |
| 2      | 0.714208 | 0         | 0        | 6  | 0.597383 | 0.17941   | 1.61469  | 10 | 0.47829  | 0.66846   | 6.01614  |
| 3      | 0.49016  | 0.60103   | 5.40927  | 7  | 0.308097 | 2.81458   | 25.33122 | 11 | 0.343549 | 2.06243   | 18.56187 |
| 4      | 0.484177 | 0.63434   | 5.70906  | 8  | 0.720371 | 0         | 0        | 12 | 0.381486 | 1.50288   | 13.52592 |
| 13     | 0.617939 | 0.72638   | 6.53742  | 17 | 0.412944 | 1.161003  | 10.44903 | 21 | 0.319219 | 2.547149  | 22.92434 |
| 14     | 0.476083 | 0.66846   | 6.01614  | 18 | 0.561316 | 0.290458  | 2.614119 | 22 | 0.575136 | 0.244856  | 2.203704 |
| 15     | 0.298522 | 2.06243   | 18.56187 | 19 | 0.487744 | 0.614318  | 5.528866 | 23 | 0.192043 | 10.89473  | 98.05257 |
| 16     | 0.284371 | 1.50288   | 13.52592 | 20 | 0.759952 | 0         | 0        | 24 | 0.48876  | 0.608706  | 5.478352 |
| 25     | 0.220394 | 7.175064  | 64.57558 | 29 | 0.214475 | 7.769806  | 69.92825 | 33 | 0.201166 | 9.420669  | 84.78603 |
| 26     | 0.39166  | 1.382407  | 12.44167 | 30 | 0.146863 | 30.4654   | 274.1886 | 34 | 0.247092 | 5.186258  | 46.67632 |
| 27     | 0.720933 | 0         | 0        | 31 | 0.248035 | 5.131479  | 46.18331 | 35 | 0.275078 | 3.85402   | 34.68618 |
| 28     | 0.520283 | 0.452014  | 4.068129 | 32 | 0.254485 | 4.778153  | 43.00338 | 36 | 0.090231 | 100       | 900      |

■ B  
— Logistic Fit of B

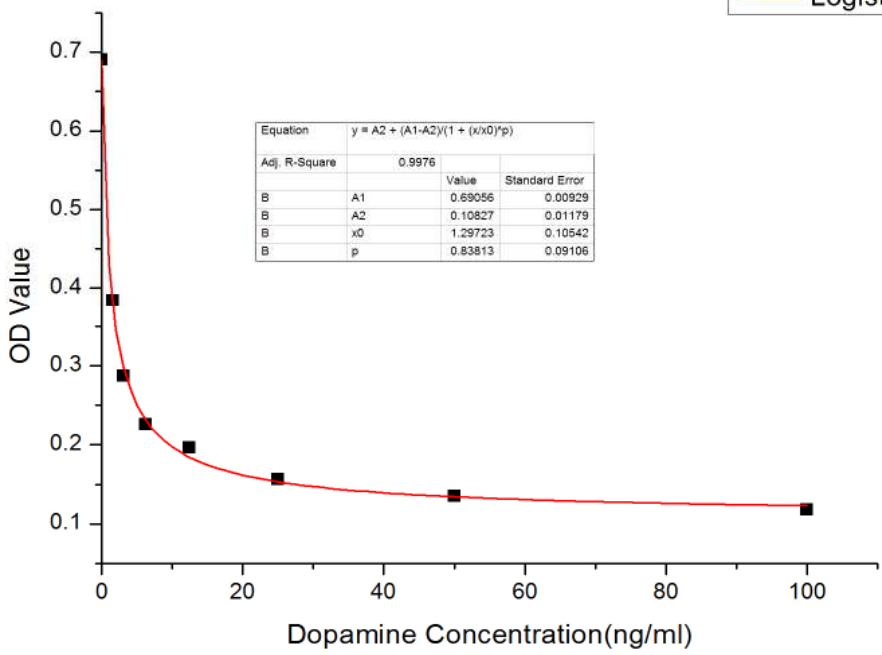



20180802 Dopamine ELISA Assay

|   |    |    |    |   |   |    |    |    |    |    |    |    |
|---|----|----|----|---|---|----|----|----|----|----|----|----|
|   | 1  | 2  | 3  | 4 | 5 | 6  | 7  | 8  | 9  | 10 | 11 | 12 |
| A | S1 | S1 | S1 | 1 | 5 | 9  | 13 | 17 | 21 | 25 | 29 | 33 |
| B | S2 | S2 | S2 |   |   |    |    |    |    |    |    |    |
| C | S3 | S3 | S3 | 2 | 6 | 10 | 14 | 18 | 22 | 26 | 30 | 34 |
| D | S4 | S4 | S4 |   |   |    |    |    |    |    |    |    |
| E | S5 | S5 | S5 | 3 | 7 | 11 | 15 | 19 | 23 | 27 | 31 | 35 |
| F | S6 | S6 | S6 |   |   |    |    |    |    |    |    |    |
| G | S7 | S7 | S7 | 4 | 8 | 12 | 16 | 20 | 24 | 28 | 32 | 36 |
| H | S8 | S8 | S8 |   |   |    |    |    |    |    |    |    |

|   | 1        | 2        | 3        | 4        | 5        | 6        | 7        | 8        | 9        | 10       | 11       | 12       | Standard |            |          |
|---|----------|----------|----------|----------|----------|----------|----------|----------|----------|----------|----------|----------|----------|------------|----------|
| A | 0.83257  | 0.847309 | 1.015791 | 0.242141 | 0.471177 | 0.249879 | 0.417088 | 0.471199 | 0.555919 | 0.257172 | 0.489358 | 0.34001  |          | 0 ng/ml    | 0.898557 |
| B | 0.426951 | 0.482245 | 0.424085 | 0.309599 | 0.473335 | 0.298041 | 0.423535 | 0.520224 | 0.568909 | 0.365764 | 0.513086 | 0.298913 |          | 1.56 ng/ml | 0.444427 |
| C | 0.353122 | 0.336884 | 0.334509 | 0.298036 | 0.776892 | 0.738835 | 0.395855 | 0.657483 | 0.896366 | 0.960557 | 0.394186 | 0.434092 |          | 3.13 ng/ml | 0.341505 |
| D | 0.266638 | 0.242045 | 0.278442 | 0.26331  | 0.847421 | 0.740014 | 0.363378 | 0.738138 | 0.882992 | 1.061084 | 0.407134 | 0.431214 |          | 6.25 ng/ml | 0.262375 |
| E | 0.217273 | 0.190018 | 0.18448  | 0.380443 | 0.612518 | 0.303249 | 0.476979 | 0.498327 | 0.397094 | 0.986907 | 0.241192 | 0.601344 |          | 12.5 ng/ml | 0.197257 |
| F | 0.146887 | 0.146976 | 0.14193  | 0.345936 | 0.511187 | 0.262434 | 0.548947 | 0.504838 | 0.399989 | 0.934008 | 0.182766 | 0.658168 |          | 25 ng/ml   | 0.145264 |
| G | 0.12884  | 0.128411 | 0.151316 | 0.321092 | 0.304167 | 0.611182 | 0.107958 | 0.417823 | 0.292701 | 0.337861 | 0.750885 | 0.499469 |          | 50 ng/ml   | 0.136189 |
| H | 0.10288  | 0.103834 | 0.110114 | 0.282371 | 0.30865  | 0.509439 | 0.102924 | 0.379753 | 0.218146 | 0.353089 | 0.737961 | 0.477779 |          | 100 ng/ml  | 0.105609 |

| AD-Ca | OD Value | DA(ng/ml) | DA(ng/g) | OD Value | DA(ng/ml) | DA(ng/g) | OD Value | DA(ng/ml) | DA(ng/g) |          |          |
|-------|----------|-----------|----------|----------|-----------|----------|----------|-----------|----------|----------|----------|
| 1     | 0.27587  | 5.364256  | 48.2783  | 5        | 0.472256  | 1.303061 | 11.72755 | 9         | 0.27396  | 5.456396 | 49.10757 |
| 2     | 0.280673 | 5.141997  | 46.27797 | 6        | 0.812157  | 0.07084  | 0.637562 | 10        | 0.739425 | 0.180894 | 1.628048 |
| 3     | 0.363189 | 2.700151  | 24.30136 | 7        | 0.561853  | 0.729485 | 6.565365 | 11        | 0.282841 | 5.045863 | 45.41277 |
| 4     | 0.301732 | 4.304249  | 38.73824 | 8        | 0.306408  | 4.143854 | 37.29468 | 12        | 0.56031  | 0.736971 | 6.63274  |
| 13    | 0.420312 | 1.827128  | 16.44415 | 17       | 0.495712  | 1.120776 | 10.08698 | 21        | 0.562414 | 0.726778 | 6.541003 |
| 14    | 0.379616 | 2.405945  | 21.6535  | 18       | 0.697811  | 0.267172 | 2.404547 | 22        | 0.889679 | 0.003146 | 0.028318 |
| 15    | 0.512963 | 1.003107  | 9.027965 | 19       | 0.501582  | 1.079295 | 9.713651 | 23        | 0.398541 | 2.113518 | 19.02166 |
| 16    | 0.105441 | >100      | >1000    | 20       | 0.398788  | 2.10999  | 18.98991 | 24        | 0.255423 | 6.479505 | 58.31555 |
| 25    | 0.311468 | 3.979231  | 35.81308 | 29       | 0.501222  | 1.081795 | 9.736159 | 33        | 0.319462 | 3.736469 | 33.62822 |
| 26    | 1.010821 | 0         | 0        | 30       | 0.40066   | 2.083475 | 18.75128 | 34        | 0.432653 | 1.684513 | 15.16062 |
| 27    | 0.960457 | 0         | 0        | 31       | 0.211979  | 10.31762 | 92.85856 | 35        | 0.629756 | 0.45659  | 4.109307 |
| 28    | 0.345475 | 3.069137  | 27.62223 | 32       | 0.744423  | 0.171775 | 1.545978 | 36        | 0.488624 | 1.172965 | 10.55669 |

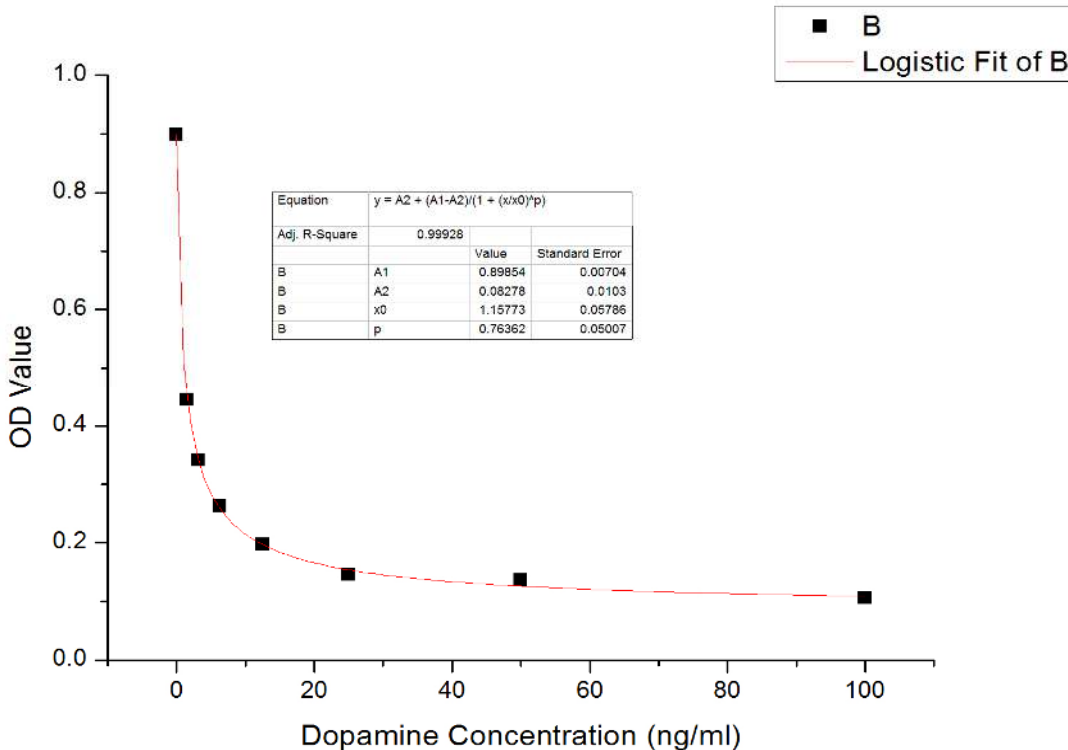

20180806 Dopamine ELISA Assay

|   |    |    |    |   |   |    |    |    |    |    |    |    |
|---|----|----|----|---|---|----|----|----|----|----|----|----|
|   | 1  | 2  | 3  | 4 | 5 | 6  | 7  | 8  | 9  | 10 | 11 | 12 |
| A | S1 | S1 | S1 | 1 | 5 | 9  | 13 | 17 | 21 | 25 | 29 | 33 |
| B | S2 | S2 | S2 |   |   |    |    |    |    |    |    |    |
| C | S3 | S3 | S3 | 2 | 6 | 10 | 14 | 18 | 22 | 26 | 30 | 34 |
| D | S4 | S4 | S4 |   |   |    |    |    |    |    |    |    |
| E | S5 | S5 | S5 | 3 | 7 | 11 | 15 | 19 | 23 | 27 | 31 | 35 |
| F | S6 | S6 | S6 |   |   |    |    |    |    |    |    |    |
| G | S7 | S7 | S7 | 4 | 8 | 12 | 16 | 20 | 24 | 28 | 32 | 36 |
| H | S8 | S8 | S8 |   |   |    |    |    |    |    |    |    |

|   | 1        | 2        | 3        | 4        | 5        | 6        | 7        | 8        | 9        | 10       | 11       | 12       | Standard   |          |
|---|----------|----------|----------|----------|----------|----------|----------|----------|----------|----------|----------|----------|------------|----------|
| A | 1.055036 | 1.213436 | 1.055975 | 0.446578 | 0.411112 | 0.523102 | 0.528259 | 0.186685 | 0.54219  | 0.333223 | 0.50617  | 0.396995 | 0 ng/ml    | 1.108149 |
| B | 0.535614 | 0.556445 | 0.575077 | 0.488827 | 0.423378 | 0.610528 | 0.594977 | 0.231512 | 0.608191 | 0.391346 | 0.627097 | 0.421016 | 1.56 ng/ml | 0.555712 |
| C | 0.399961 | 0.410638 | 0.452053 | 0.477574 | 0.709622 | 0.504011 | 0.677549 | 0.498202 | 0.922071 | 0.972373 | 0.370854 | 0.417188 | 3.13 ng/ml | 0.420884 |
| D | 0.279394 | 0.284816 | 0.306283 | 0.474712 | 0.572725 | 0.41621  | 0.587204 | 0.556305 | 0.872928 | 0.976184 | 0.39957  | 0.411171 | 6.25 ng/ml | 0.290164 |
| E | 0.222954 | 0.1927   | 0.243007 | 0.416153 | 0.832126 | 1.222704 | 0.408492 | 0.769039 | 0.506821 | 1.337685 | 0.362603 | 0.640634 | 12.5 ng/ml | 0.219554 |
| F | 0.219449 | 0.202064 | 0.209432 | 0.343591 | 0.854782 | 0.995678 | 0.420046 | 0.907929 | 0.54619  | 1.150747 | 0.300685 | 0.609442 | 25 ng/ml   | 0.210315 |
| G | 0.163714 | 0.159985 | 0.161938 | 0.457181 | 0.53901  | 0.395496 | 0.700021 | 0.716112 | 0.378447 | 0.345328 | 0.988748 | 0.419086 | 50 ng/ml   | 0.161879 |
| H | 0.135812 | 0.145722 | 0.142189 | 0.543858 | 0.577635 | 0.419683 | 0.767861 | 0.657278 | 0.338012 | 0.346629 | 0.987777 | 0.430216 | 100 ng/ml  | 0.141241 |

| AD-Pu | OD Value | DA (ng/ml) | DA (ng/g) | OD Value | DA (ng/ml) | DA (ng/g) | OD Value | DA (ng/ml) | DA (ng/g) |
|-------|----------|------------|-----------|----------|------------|-----------|----------|------------|-----------|
| 1     | 0.467702 | 2.355795   | 21.20215  | 5        | 0.417245   | 3.034966  | 9        | 0.566815   | 1.499499  |
| 2     | 0.476143 | 2.26256    | 20.36304  | 6        | 0.641173   | 1.085832  | 10       | 0.460111   | 2.443967  |
| 3     | 0.379872 | 3.727017   | 33.54315  | 7        | 0.843454   | 0.419557  | 11       | 1.109191   | 0         |
| 4     | 0.50052  | 2.018469   | 18.16622  | 8        | 0.558322   | 1.556495  | 12       | 0.407589   | 3.194877  |
| 13    | 0.561618 | 1.534095   | 13.80685  | 17       | 0.209099   | 16.54662  | 21       | 0.575191   | 1.445549  |
| 14    | 0.632377 | 1.127991   | 10.15192  | 18       | 0.527253   | 1.787101  | 22       | 0.8975     | 0.305432  |
| 15    | 0.414269 | 3.083025   | 27.74722  | 19       | 0.838484   | 0.431026  | 23       | 0.526506   | 1.793122  |
| 16    | 0.733941 | 0.72054    | 6.484862  | 20       | 0.686695   | 0.890288  | 24       | 0.358229   | 4.238427  |
| 25    | 0.362285 | 4.134884   | 37.21396  | 29       | 0.566633   | 1.500696  | 33       | 0.409006   | 3.170685  |
| 26    | 0.974278 | 0.171439   | 1.542955  | 30       | 0.385212   | 3.614956  | 34       | 0.414449   | 3.080097  |
| 27    | 1.244216 | 0          | 0         | 31       | 0.331644   | 5.027456  | 35       | 0.625038   | 1.164387  |
| 28    | 0.345978 | 4.576367   | 41.1873   | 32       | 0.988263   | 0.150035  | 36       | 0.424651   | 2.919827  |

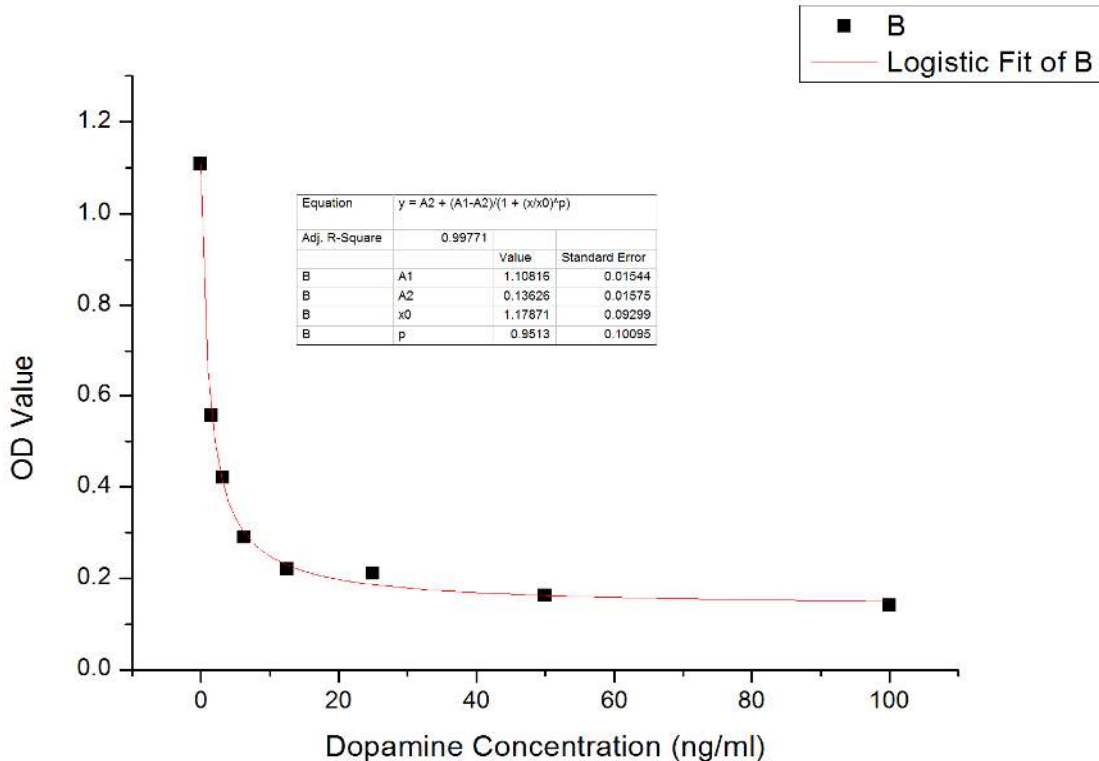

Supplement: NIHMS1054973-supplement-Supp_info.pdf [file NIHMS1054973-supplement-Supp_info.pdf]
