# Supplementary material for: The interactions of dopamine and oxidative damage in the striatum of patients with neurodegenerative diseases
Source: PubMed Central journal article supplement (PMC6981021; doi:10.1111/jnc.14898), 2019-11-04
Supplement: NIHMS1054973-supplement-Supp_figS1-7.pdf [file NIHMS1054973-supplement-Supp_figS1-7.pdf]

## The Interactions of Dopamine and Oxidative Damage in the Striatum of Neurodegenerative Diseases Patients

Huifangjie Li, Pengfei Yang<sup>1</sup>, William Knight<sup>1</sup>, Yingqiu Guo<sup>1</sup>, Joel S. Perlmutter<sup>1, 2-5</sup>, Tammie L.S. Benzinger<sup>1</sup>, John C. Morris<sup>2</sup>, Jinbin Xu<sup>1,\*</sup>

Department of <sup>1</sup>Radiology, <sup>2</sup>Neurology, <sup>3</sup>Neuroscience, <sup>4</sup>Physical Therapy and <sup>5</sup>Occupational Therapy, Washington University School of Medicine, 510 S. Kingshighway Blvd, St. Louis, MO 63110, USA.

\*Address correspondence to:

Jinbin Xu, Ph.D, Division of Radiological Sciences, Washington University School of Medicine, Mallinckrodt Institute of Radiology, 4525 Scott Ave., 254C MDS, St. Louis MO 63110 USA. Tel: (314) 747-0693; Fax: (314) 362-8555; Email: [jinbinxu@wustl.edu](mailto:jinbinxu@wustl.edu)

Running Title: Dopamine and Oxidative Damage in the Striatum

Keywords: Oxidative damage, Dopamine, Striatum, Alzheimer's disease, Lewy body diseases

### Supplementary materials

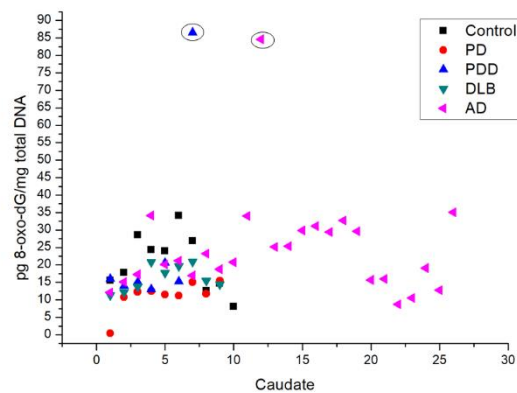

**Figure S1.** 8-oxo-dG levels in the caudate from patients with diseases and controls (Dot-plot).

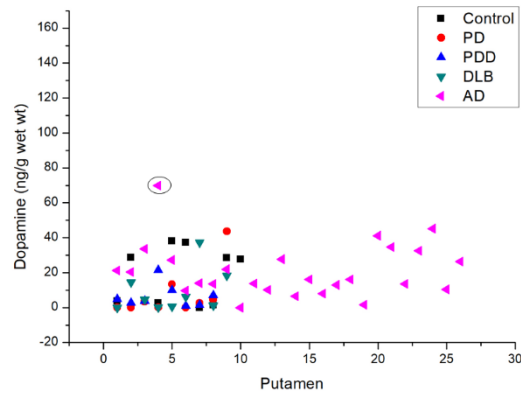

**Figure S2.** Concentration of dopamine in the putamen from patients with diseases and age-matched controls (Dot-plot).

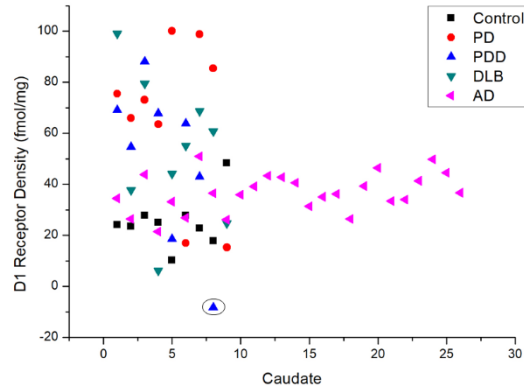

**Figure S3.** Quantitative autoradiographic analysis of D1R density in the caudate from patients with diseases and age-matched controls (Dot-plot).

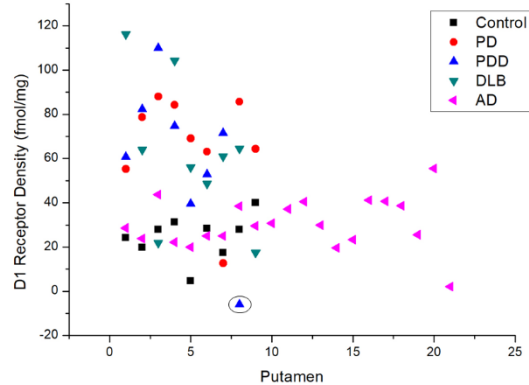

**Figure S4.** Quantitative autoradiographic analysis of D1R density in the putamen from patients with diseases and age-matched controls (Dot-plot).

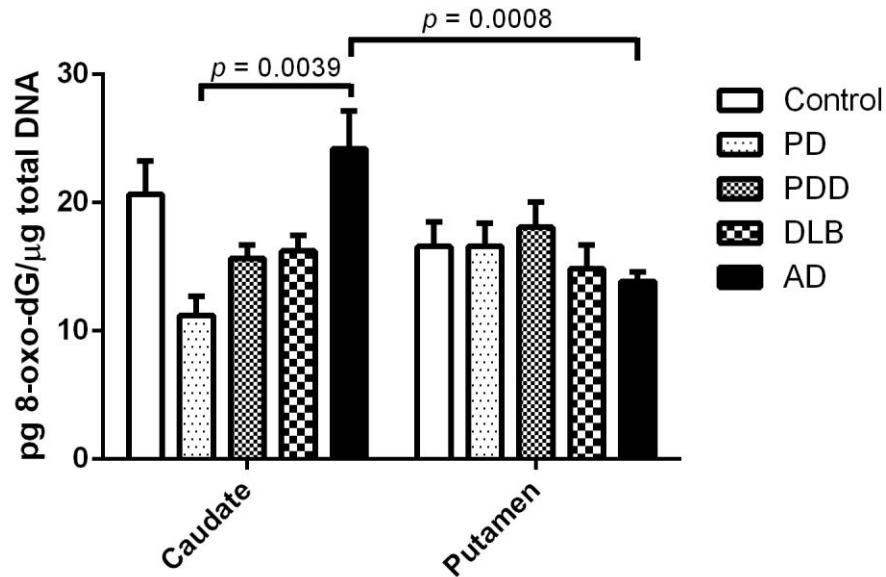

**Figure S5.** Two-way ANOVA analysis of 8-oxo-dG levels in the caudate and putamen from patients with diseases (PD: n=10, PDD: n=8, DLB: n=10, AD: n=27) and age-matched controls (n=10). Value shown are means  $\pm$  SEM as the concentration of 8-oxo-dG (pg) per total DNA ( $\mu$ g). A  $p$  value of  $<0.05$  was considered significant. The statistical significance between the PD vs AD ( $p = 0.0039$ ) and caudate vs putamen ( $p = 0.0008$ ) are demonstrated with the bracket.

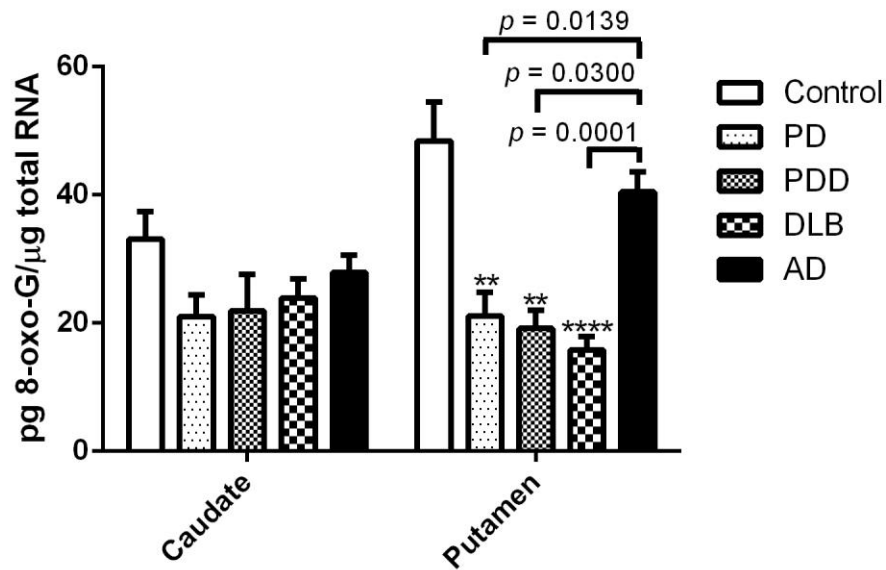

**Figure S6.** Two-way ANOVA analysis of 8-oxo-G levels in the caudate and putamen from patients with diseases (PD: n=10, PDD: n=8, DLB: n=10, AD: n=27) and age-matched controls (n=10). Value shown are means  $\pm$  SEM as the concentration of 8-oxo-G (pg) per total RNA ( $\mu$ g). A  $p$  value of  $<0.05$  was considered significant. \*\* indicates  $p < 0.01$ , \*\*\* indicates  $p < 0.001$ , \*\*\*\* indicates  $p < 0.0001$  compared with the controls. Significant differences between two non-control groups are indicated with brackets and corresponding  $p$ -values [Putamen: PD vs AD ( $p = 0.0086$ ), PDD vs AD ( $p = 0.0162$ ), DLB vs AD ( $p = 0.002$ )].

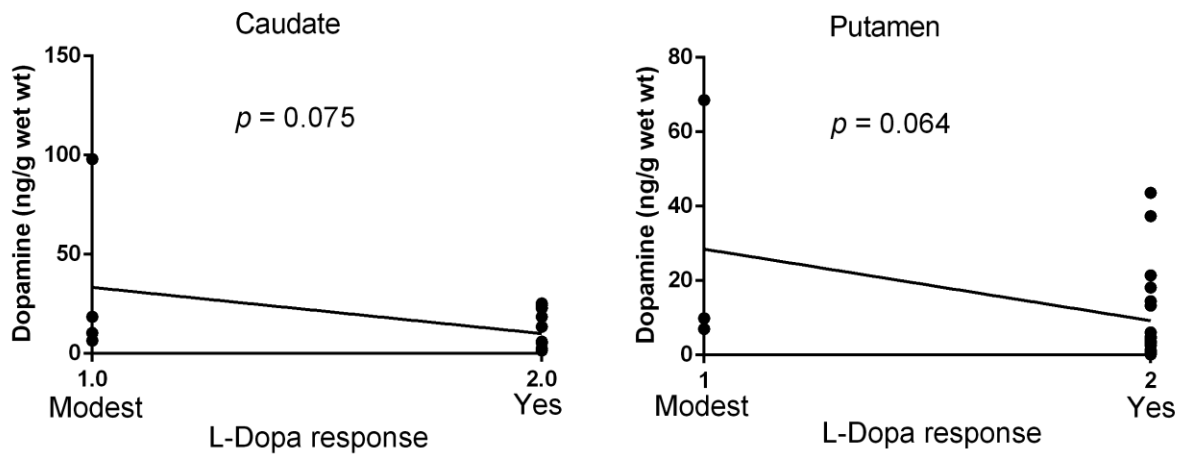

**Figure S7.** Kendall's tau\_b analysis of correlation between dopamine concentration and L-Dopa response in the caudate and putamen of LBD patients
